# Supplementary material for: Dynamic Compressive Loading Improves Cartilage Repair in an In Vitro Model of Microfracture: Comparison of 2 Mechanical Loading Regimens on Simulated Microfracture Based on Fibrin Gel Scaffolds Encapsulating Connective Tissue Progenitor Cells
Source: PubMed Central journal article supplement — Am J Sports Med. 2019 Jul 15;47(9):2188–99. doi: 10.1177/0363546519855645 (PMC6637720; doi:10.1177/0363546519855645), 2019-07-15
Supplement: DS_10.1177_0363546519855645.pdf [file DS_10.1177_0363546519855645.pdf]

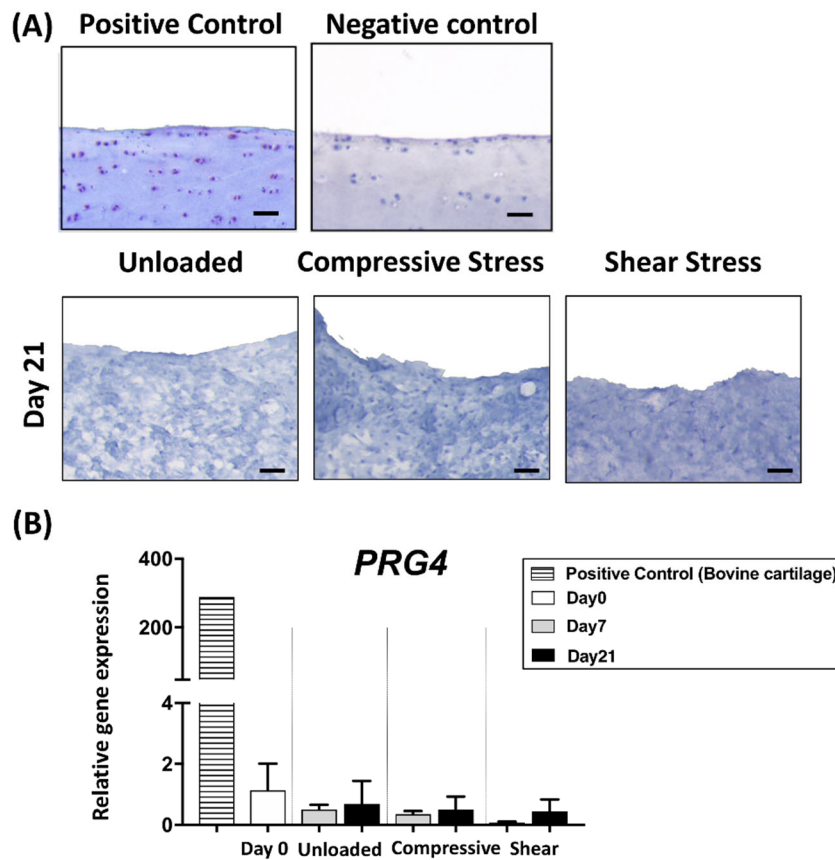

**Appendix Figure A1.** (A) Immunohistochemistry for proteoglycan 4 (PRG4). Adult bovine cartilage was used as positive control. Negative control treated without primary antibody (PRG4). Bars, 200 μm. (B) Gene expression of fibrin + cells group cultured under three mechanical loading conditions was analyzed by qRT-PCR for *PRG4*. All expression levels are calculated relative to day 0 controls. Comparison with day 0 controls against other time points within the same loading condition were not significantly different ( $p > 0.05$ ). Comparison between loading conditions at the same time point did not yield significant differences. ( $p > 0.05$ ). Sample number of positive control is one, and all other conditions are n=3.

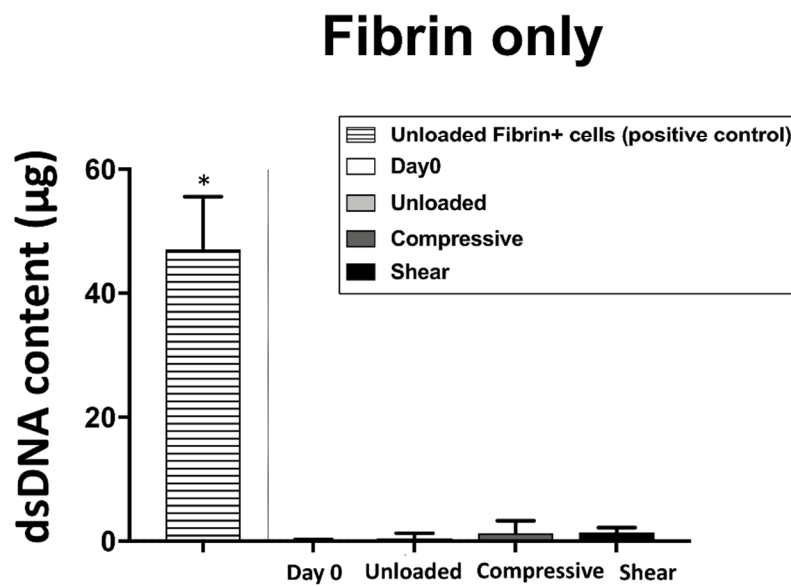

**Appendix Figure A2.** Day 14 dsDNA content, by loading condition. \* = significantly higher than day 0 and day 14 of all loading conditions ( $p < 0.05$ ).
